# Supplementary material for: Direct radiative effects of intense Mediterranean desert dust outbreaks
Source: Copernicus journal article supplement (doi:10.5194/acp-2017-932), 2017-11-10
Supplement: Supplementary file 1 [file acp-2017-932-supplement.pdf]

MODIS-Terra (Total AOD at 550nm)

NMMB-MONARCH (Dust AOD at 550nm)

31 Jul 2001

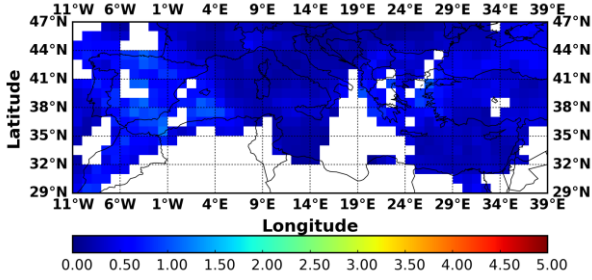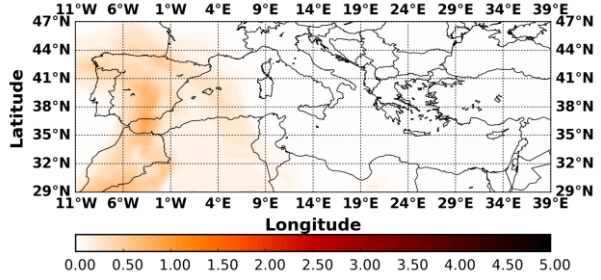

8 May 2002

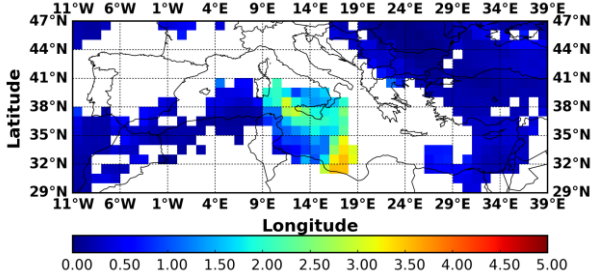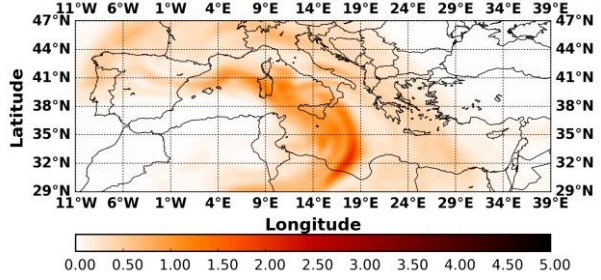

4 Apr 2003

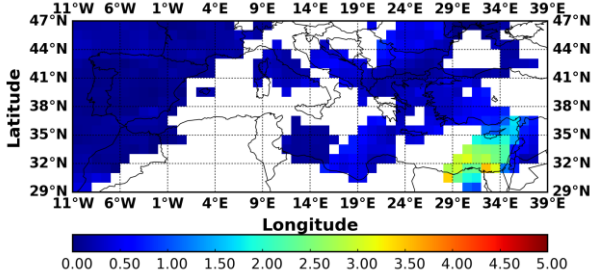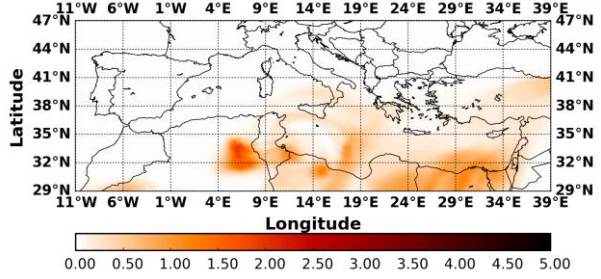

16 Jul 2003

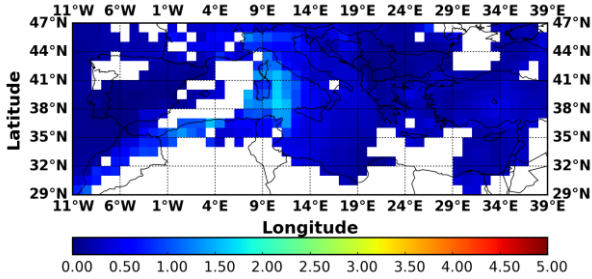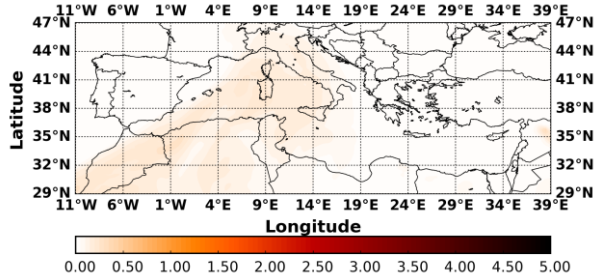

22 Feb 2004

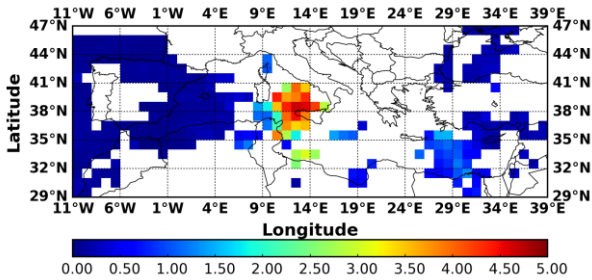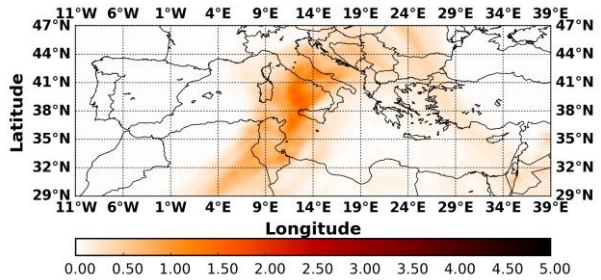

26 Mar 2004

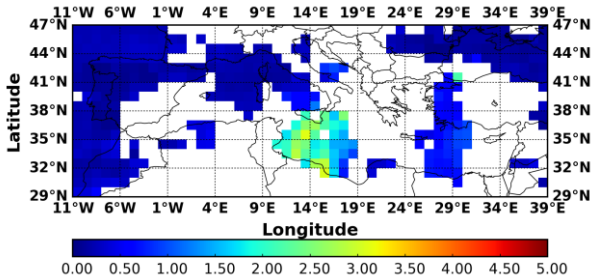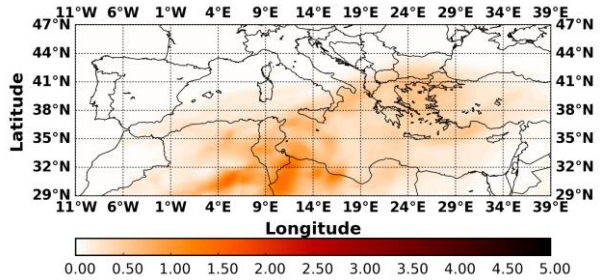

27 Jan 2005

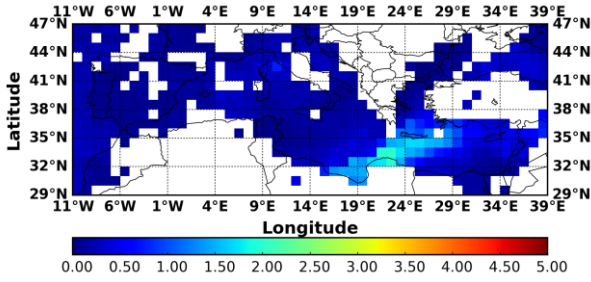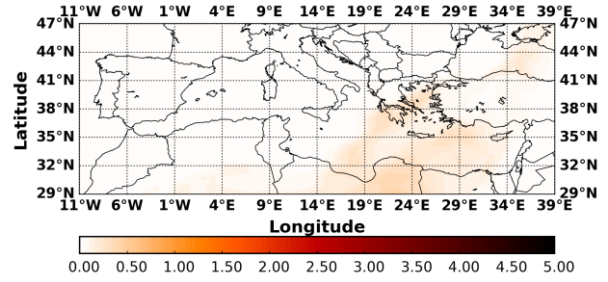

28 Jul 2005

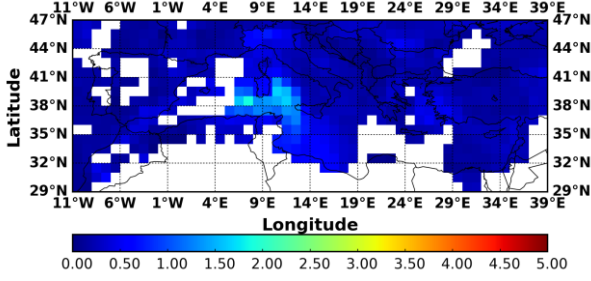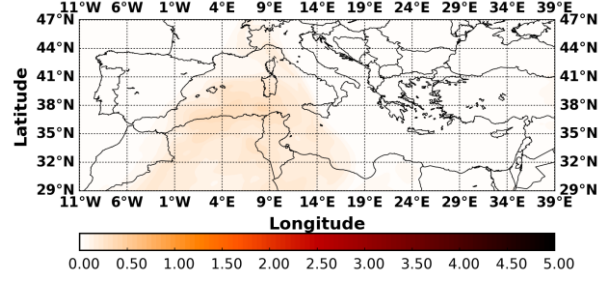

24 Feb 2006

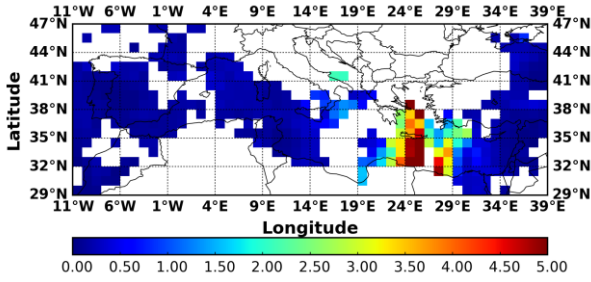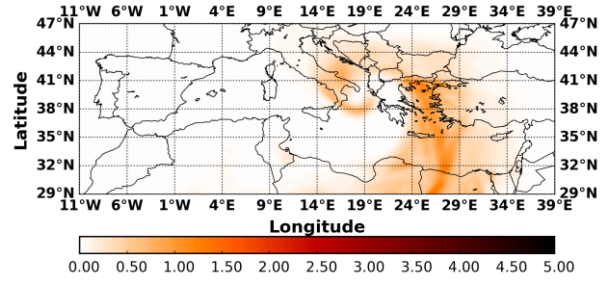

19 Mar 2006

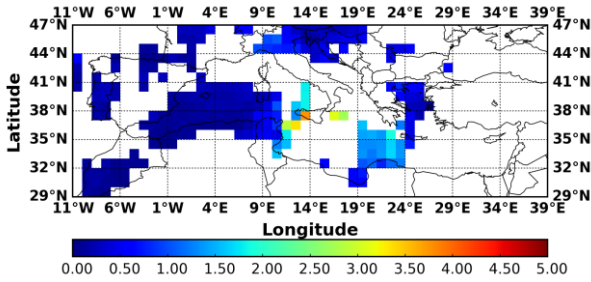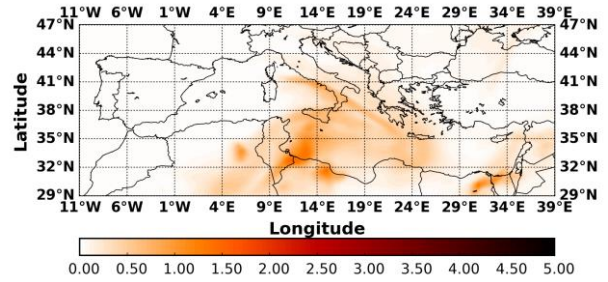

24 Feb 2007

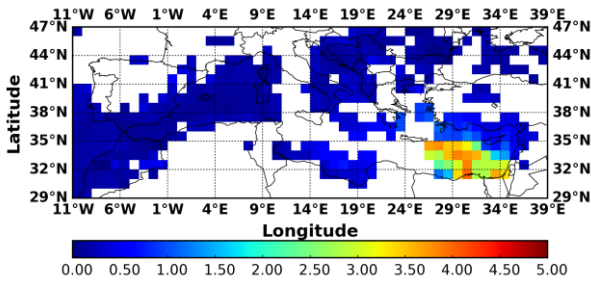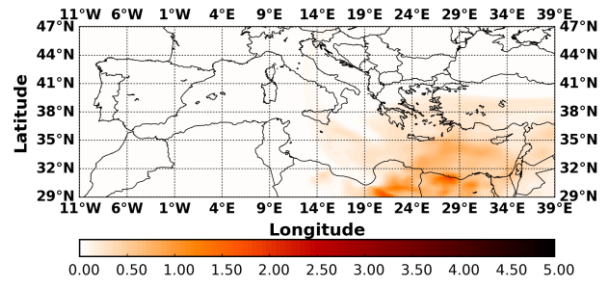

21 Apr 2007

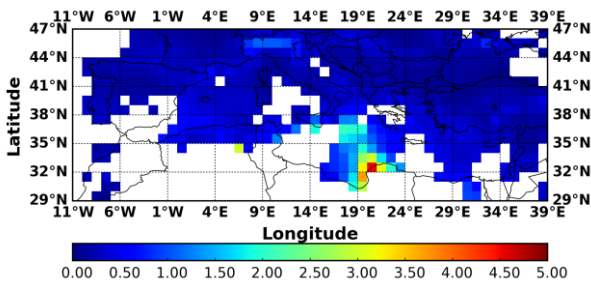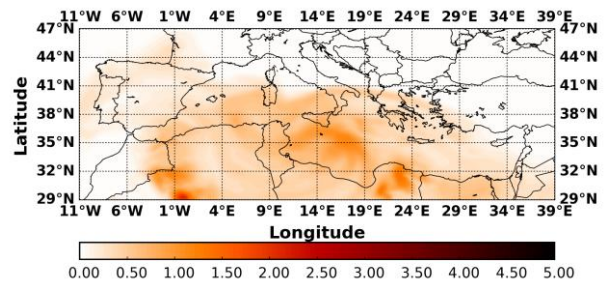

29 May 2007

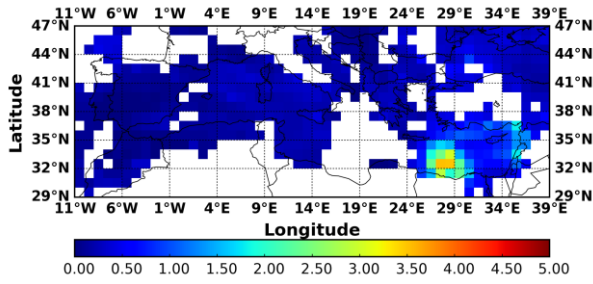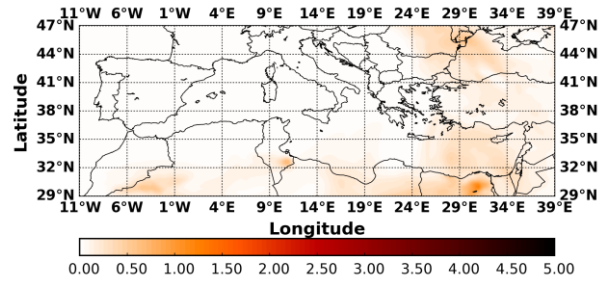

10 Apr 2008

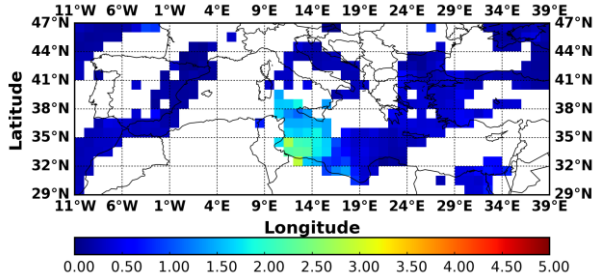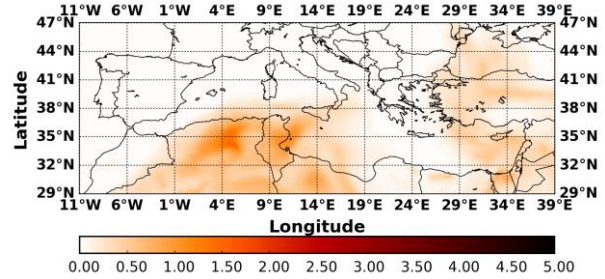

23 Jan 2009

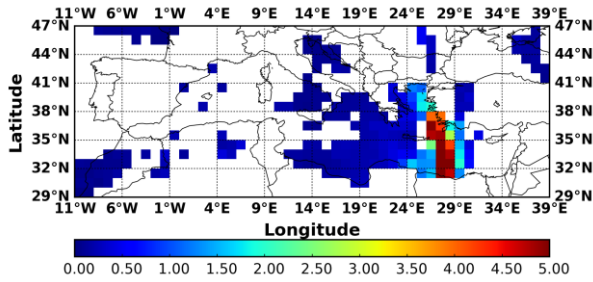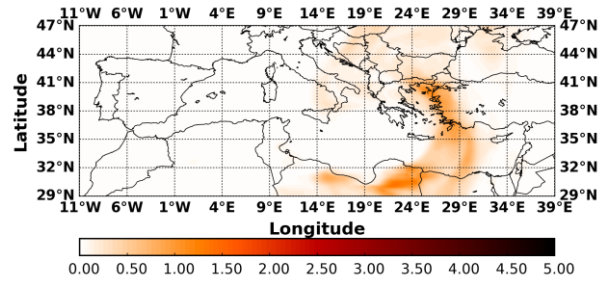

6 Mar 2009

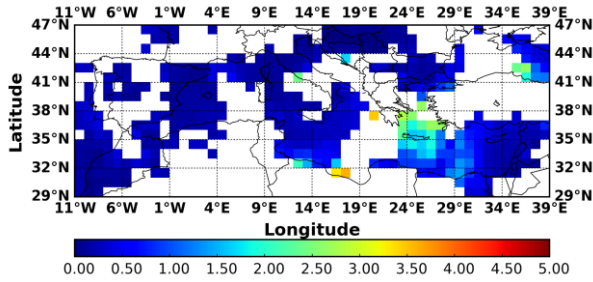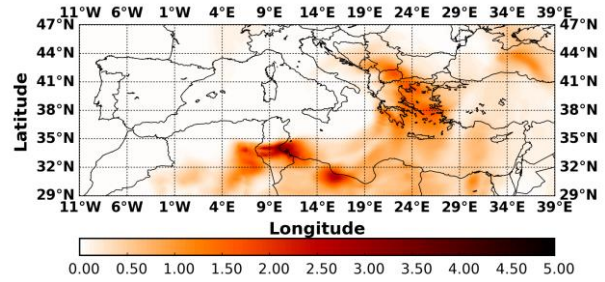

27 Mar 2010

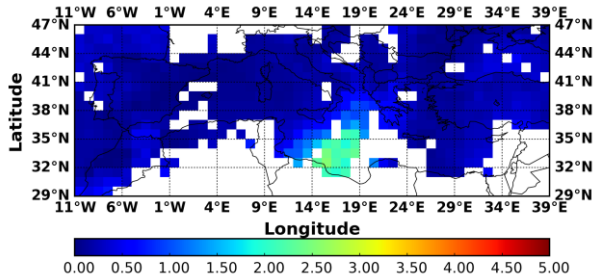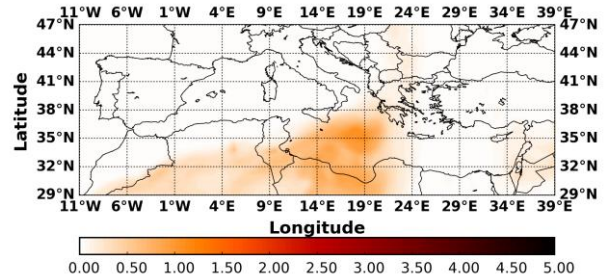

**Figure S1:** Geographical distributions of the daily averaged MODIS-Terra AOD at 550nm (left column) and the simulated dust AOD at 550nm at 12:00 UTC (right column) for the Mediterranean desert dust outbreaks that took place on 31<sup>st</sup> July 2001, 8<sup>th</sup> May 2002, 4<sup>th</sup> April 2003, 16<sup>th</sup> July 2003, 22<sup>nd</sup> February 2004, 26<sup>th</sup> March 2004, 27<sup>th</sup> January 2005, 28<sup>th</sup> July 2005, 24<sup>th</sup> February 2006, 19<sup>th</sup> March 2006, 24<sup>th</sup> February 2007, 21<sup>st</sup> April 2007, 29<sup>th</sup> May 2007, 10<sup>th</sup> April 2008, 23<sup>rd</sup> January 2009, 6<sup>th</sup> March 2009 and 27<sup>th</sup> March 2010.

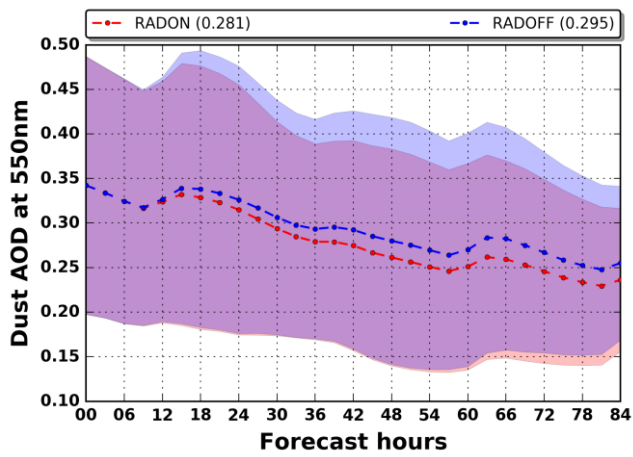

(i)

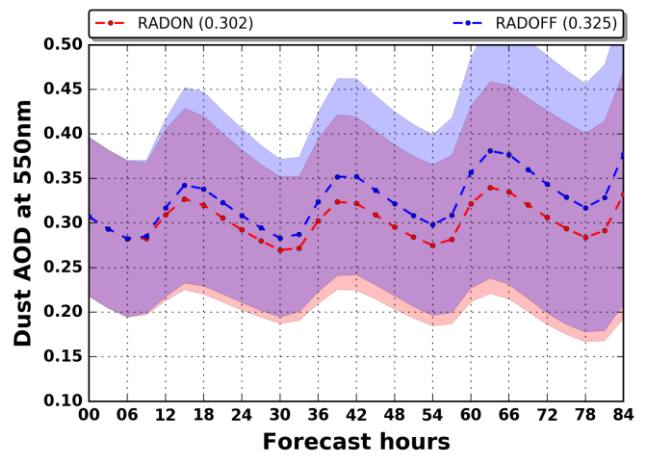

(ii)

**Figure S2:** Regional dust AOD at 550nm averaged over: (i) the Mediterranean Satellite Domain (MSD) and (ii) the Sahara Desert Domain (SDD). Blue and red curves correspond to the mean values, calculated from the 20 desert dust outbreaks, for the RADOFF and RADON simulations, respectively, and the shaded areas represent the associated standard deviation.

**Table S1:** Minimum and maximum clear sky NET (shortwave plus longwave) DREs, in  $\text{Wm}^{-2}$ , at grid cell level (geographical distributions) for TOA (second column), ATM (third column), SURF (fourth column) and NETSURF (fifth column), over the 84-h simulation period, for each studied desert dust outbreak (first column).

| <b>Date</b>             | <b>DRE<sub>TOA</sub></b> | <b>DRE<sub>ATM</sub></b> | <b>DRE<sub>SURF</sub></b> | <b>DRE<sub>NETSURF</sub></b> |
|-------------------------|--------------------------|--------------------------|---------------------------|------------------------------|
| <b>31 July 2001</b>     | -81/56                   | -32/228                  | -377/48                   | -211/33                      |
| <b>8 May 2002</b>       | -141/35                  | -36/129                  | -272/37                   | -257/37                      |
| <b>4 April 2003</b>     | -113/36                  | -28/141                  | -220/35                   | -201/29                      |
| <b>16 July 2003</b>     | -143/46                  | -33/195                  | -338/50                   | -261/38                      |
| <b>22 February 2004</b> | -127/36                  | -30/118                  | -205/32                   | -191/29                      |
| <b>26 March 2004</b>    | -117/63                  | -38/185                  | -296/46                   | -196/34                      |
| <b>27 January 2005</b>  | -113/18                  | -34/104                  | -206/44                   | -165/37                      |
| <b>2 March 2005</b>     | -162/46                  | -40/204                  | -363/48                   | -271/36                      |
| <b>28 July 2005</b>     | -99/52                   | -32/235                  | -410/38                   | -231/39                      |
| <b>24 February 2006</b> | -120/29                  | -24/89                   | -196/31                   | -183/27                      |
| <b>19 March 2006</b>    | -133/52                  | -25/143                  | -225/29                   | -211/27                      |
| <b>24 February 2007</b> | -110/58                  | -45/258                  | -500/61                   | -258/36                      |
| <b>21 April 2007</b>    | -103/71                  | -36/205                  | -345/63                   | -190/38                      |
| <b>29 May 2007</b>      | -83/70                   | -37/253                  | -480/66                   | -258/43                      |
| <b>10 April 2008</b>    | -87/78                   | -51/239                  | -378/78                   | -180/44                      |
| <b>19 May 2008</b>      | -159/55                  | -30/148                  | -313/41                   | -295/29                      |
| <b>23 January 2009</b>  | -124/39                  | -31/155                  | -320/43                   | -197/29                      |
| <b>6 March 2009</b>     | -184/67                  | -39/319                  | -589/46                   | -337/40                      |
| <b>27 March 2010</b>    | -91/85                   | -61/285                  | -485/83                   | -258/50                      |
| <b>2 August 2012</b>    | -161/58                  | -45/189                  | -308/58                   | -290/42                      |

**Table S2:** Averaged differences (biases), calculated over the 84-h simulation period, between model outputs (RADON/RADOFF) and ground measurements (BSRN) of the downwelling SW radiation at the ground. For each desert dust outbreak (rows), the obtained results are provided for the six BSRN stations (columns) considered in the evaluation analysis. Empty cells correspond to cases where the ground measurements were not totally available throughout the simulation period.

| Date             | Izana       | Cener       | Palaiseau   | Carpentras | Tamanrasset | Sede Boker |
|------------------|-------------|-------------|-------------|------------|-------------|------------|
| 31 July 2001     |             |             |             | 65.9/86.7  | 56.0/68.6   |            |
| 8 May 2002       |             |             |             | 89.5/124.7 | 69.2/80.5   |            |
| 4 April 2003     |             |             |             | 12.4/22.1  | 12.4/20.4   | 42.2/75.5  |
| 16 July 2003     |             |             |             |            |             |            |
| 22 February 2004 |             |             |             |            | 20.2/26.5   | 33.9/51.1  |
| 26 March 2004    |             |             |             | -1.7/14.9  | 47.7/65.7   | 61.1/78.7  |
| 27 January 2005  |             |             |             | 10.6/17.9  | 15.7/23.7   | 37.0/54.3  |
| 2 March 2005     |             |             |             | 21.4/34.6  | 30.2/57.6   | 7.2/37.3   |
| 28 July 2005     |             |             |             | 66.6/63.9  | 34.1/49.9   | 6.4/21.7   |
| 24 February 2006 |             |             | 35.7/39.2   | -3.8/2.3   | 17.2/20.7   |            |
| 19 March 2006    |             |             | -0.2/10.1   |            | 21.1/32.1   | 37.0/56.6  |
| 24 February 2007 |             |             | 0.9/1.1     | 15.7/20.9  | 15.9/21.2   | 3.1/12.7   |
| 21 April 2007    |             |             |             |            | 112.1/137.4 | 40.9/69.0  |
| 29 May 2007      |             |             | 5.8/14.1    | 86.4/105.4 | 16.5/26.9   | 2.7/23.3   |
| 10 April 2008    |             |             | -6.0/-6.4   | 48.3/57.6  | 14.1/35.8   | 30.3/50.5  |
| 19 May 2008      |             |             | 31.9/36.9   |            | 37.6/68.5   | 16.6/40.7  |
| 23 January 2009  |             |             |             | 0.2/2.5    | 11.8/17.1   | 8.3/18.2   |
| 6 March 2009     |             |             | 37.9/54.0   |            | 27.0/32.2   | -17.8/15.0 |
| 27 March 2010    | -40.7/-33.1 | 20.0/19.4   | -26.5/-15.1 | 46.1/55.6  | 17.8/36.6   | 64.4/71.8  |
| 2 August 2012    | -76.7/-11.5 | -38.3/-31.8 | 38.5/51.2   | 16.2/31.3  | -24.9/6.2   | 2.4/15.0   |

**Table S3:** As in Table S2 but for the downwelling LW radiation at the ground.

| Date             | Izana     | Cener     | Palaiseau   | Carpentras  | Tamanrasset | Sede Boker  |
|------------------|-----------|-----------|-------------|-------------|-------------|-------------|
| 31 July 2001     |           |           |             | -19.1/-19.6 | -14.7/-16.2 |             |
| 8 May 2002       |           |           |             | -2.5/-6.6   | -17.4/-16.8 |             |
| 4 April 2003     |           |           |             | -21.5/-21.7 | -7.1/-7.5   | -14.0/-16.7 |
| 16 July 2003     |           |           |             |             |             |             |
| 22 February 2004 |           |           |             |             | -2.7/-2.8   | -23.6/-25.3 |
| 26 March 2004    |           |           |             | -16.0/-17.3 | -3.2/-5.3   | -22.3/-23.4 |
| 27 January 2005  |           |           |             | -11.6/-11.8 | -10.2/-10.6 | 2.2/-3.6    |
| 2 March 2005     |           |           |             | 2.5/4.7     | -4.7/-8.3   | -7.5/-8.8   |
| 28 July 2005     |           |           |             | -25.0/-24.6 | -22.7/-24.3 |             |
| 24 February 2006 |           |           | -15.0/-15.7 | 0.8/1.0     | -4.8/-4.7   |             |
| 19 March 2006    |           |           | 2.6/3.7     |             | -11.5/-13.1 |             |
| 24 February 2007 |           |           | 11.9/12.5   | -12.0/-15.9 | -3.6/-4.0   | -14.0/-15.5 |
| 21 April 2007    |           |           |             |             | -8.5/-7.2   | 6.3/0.7     |
| 29 May 2007      |           |           | -9.4/-8.7   | -12.0/-12.3 | -21.1/-22.5 | 11.6/8.4    |
| 10 April 2008    |           |           | 14.3/11.8   | -11.2/-10.6 | -14.2/-17.9 | -3.0/-7.2   |
| 19 May 2008      |           |           | -13.9/-9.1  |             | -13.4/-15.4 | -7.1/-9.4   |
| 23 January 2009  |           |           |             | -4.2/-3.7   | -1.6/-2.1   | -1.2/1.1    |
| 6 March 2009     |           |           | 2.4/-0.6    |             | -12.7/-12.1 | 5.5/3.9     |
| 27 March 2010    | 96.9/95.8 | -5.1/0.3  | 3.6/-0.2    | -7.9/-14.4  | -22.5/-24.3 | -9.0/-8.1   |
| 2 August 2012    | 61.2/51.1 | 16.2/17.6 | -1.7/-1.1   | -14.7/-13.3 | -4.7/-6.7   | -3.4/-2.8   |
